# Supplementary material
Source: MDPI journal article supplement (https://www.mdpi.com/2073-4441/6/11/3478)
Supplement: s1 [file s1]

Supplementary Material

**Figure S1.** Anderson Darling (AD) normality plot of the residuals.

**Table S1.** Percent sulfate removal at different assigned levels.

| Factor | L1 | L2 | L3 | L1−L2 | L1−L3 | L2−L1 | L2−L3 | L3−L1 | L3−L2 |
| --- | --- | --- | --- | --- | --- | --- | --- | --- | --- |
| COD/SO42− | 77.6 | 70.5 | 72.0 | 7.1 | 5.7 | −7.1 | −1.4 | −5.7 | 1.4 |
| HRT | 83.8 | 68.5 | 67.8 | 15.3 | 16.0 | −15.3 | 0.7 | −16.0 | −0.7 |
| LA | 68.8 | 68.5 | 82.9 | 0.3 | −14.1 | −0.3 | −14.4 | 14.1 | 14.4 |

Notes: L1, L2 and L3 represents the level of each factor outlined in Table 2; HRT = hydraulic retention time,
LA = linoleic acid.

**Table S2.** Interaction influence of selected factors on sulfate removal rate.

| Interacting Factors | Column | SI (%) | Column * | Optimum Level |
| --- | --- | --- | --- | --- |
| COD/SO42− × LA | 1 × 3 | 59.33 | 2 | [3,3] |
| COD/SO42− × HRT | 1 × 2 | 37.65 | 3 | [3,1] |
| HRT × LA | 2 × 3 | 24.84 | 1 | [1,3] |

Notes: HRT = hydraulic retention time; LA = linoleic acid; SI = severity index; Column 1, 2 and 3 represents experimental factors X1, X2 and X3 shown in Table 2; *: denotes the constant experimental factor.

**Table S3.** Optimum conditions and performance of sulfate removal rate.

| Factor | Level Description | Level | Contribution (%) |
| --- | --- | --- | --- |
| COD/SO42− | 0.8 | 1 | 4.26 |
| HRT | 12 | 1 | 10.46 |
| LA | 1000 | 3 | 9.52 |

Notes: HRT = hydraulic retention time; LA = linoleic acid; Total contribution from all factors: 24.23%; Current grand average of performance: 73.38%; Sulfate removal rate at optimum condition: 97.61%.

© 2014 by the authors; licensee MDPI, Basel, Switzerland. This article is an open access article distributed under the terms and conditions of the Creative Commons Attribution license (http://creativecommons.org/licenses/by/4.0/).
